# Supplementary material for: Interferon-γ as a Potential Inhibitor of SARS-CoV-2 ORF6 Accessory Protein
Source: MDPI journal article supplement (doi:10.3390/ijms25042155), 2024-02-10
Supplement: s1 [file s1]

## Supplementary Materials: Interferon- $\gamma$ as a Potential Inhibitor of SARS-CoV-2 ORF6 Accessory Protein

Elena Krachmarova<sup>1,\*</sup> , Peicho Petkov<sup>2,\*</sup> , Elena Lilkova<sup>3</sup> , Dayana Stoyanova<sup>2</sup>, Kristina Malinova<sup>1</sup>, Rossitsa Hristova<sup>1</sup> , Anastas Gospodinov<sup>1</sup> , Nevena Ilieva<sup>3</sup> , Genoveva Nacheva<sup>1</sup> , Leandar Litov<sup>2</sup> 

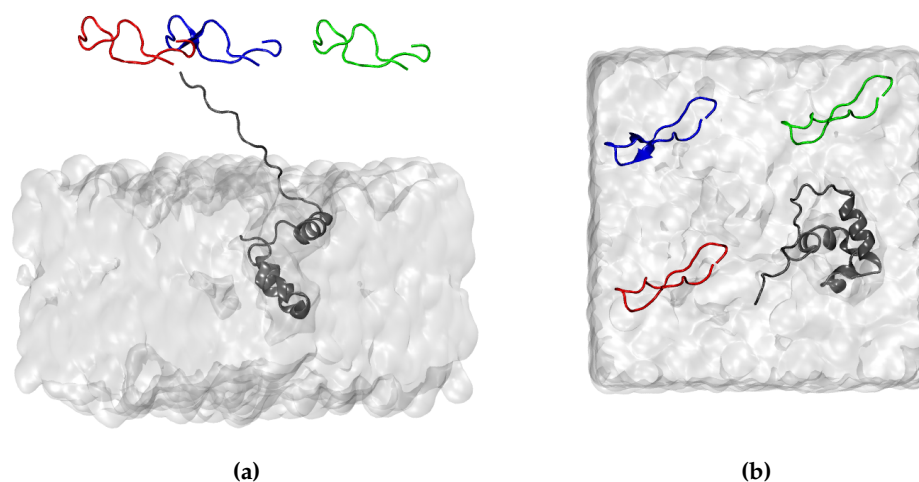

**Figure S1.** (a) side view and (b) top view of the input configuration of an ORF6 protein, embedded in a model ER membrane and three CT-hIFN $\gamma$  peptides. ORF6 is depicted in dark gray, CT-hIFN $\gamma$ -1 to CT-hIFN $\gamma$ -3 are shown respectively in red, blue, and green. The ER membrane is in light gray surface representation.

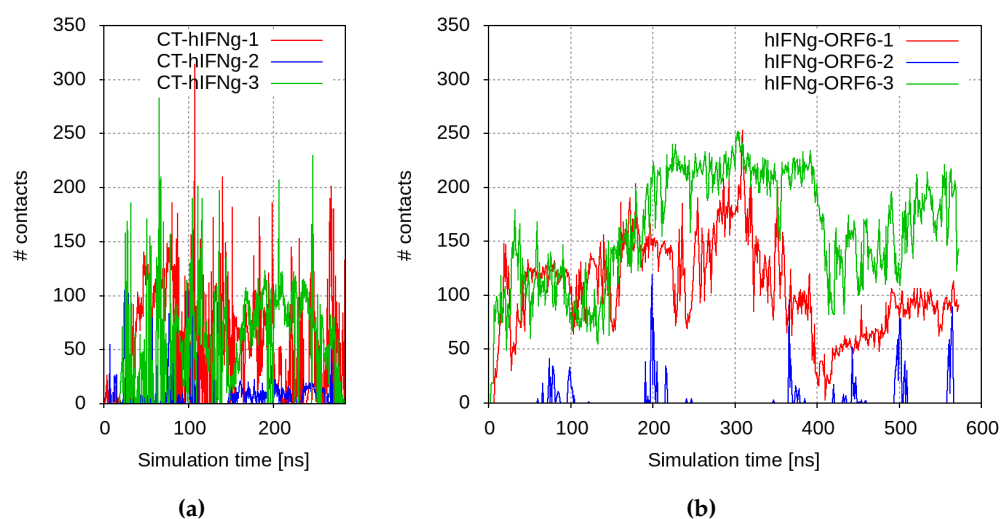

**Figure S2.** Number of contacts between (a) ORF6 and the CT-hIFN $\gamma$  peptides; and (b) hIFN $\gamma$  and the ORF6 proteins.

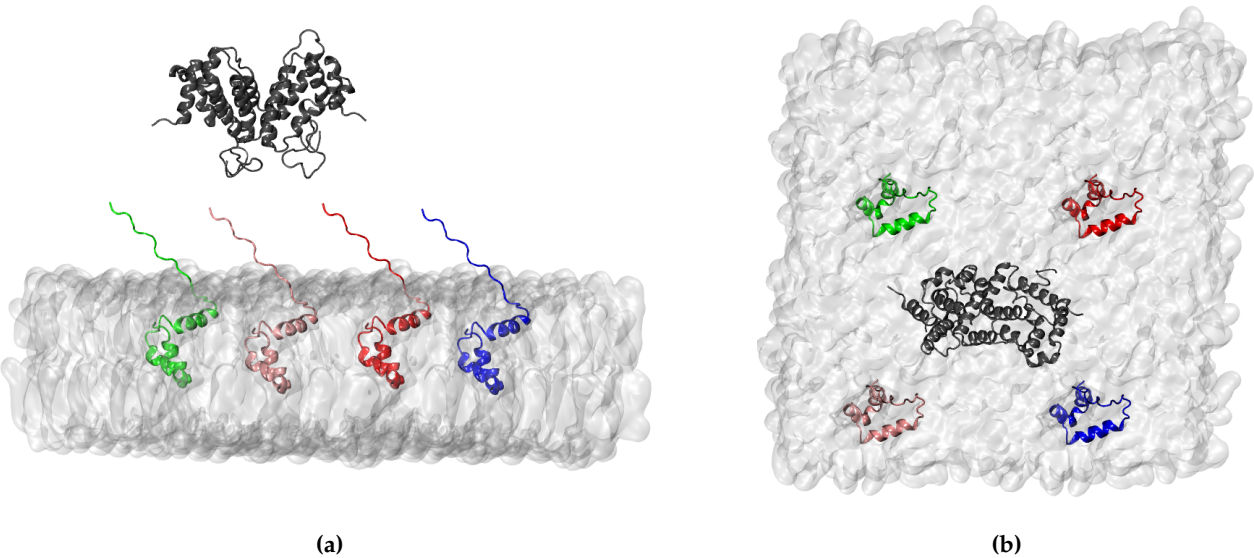

**Figure S3.** (a) side view and (b) top vie of the input configuration of a full-length hIFN $\gamma$  homdimer, placed above 4 ORF6 proteins, embedded in a model ER membrane. hIFN $\gamma$  is depicted in dark gray, ORF6-1 to ORF6-4 are shown respectively in red, blue, green, and pink. The ER membrane is in light gray surface representation.

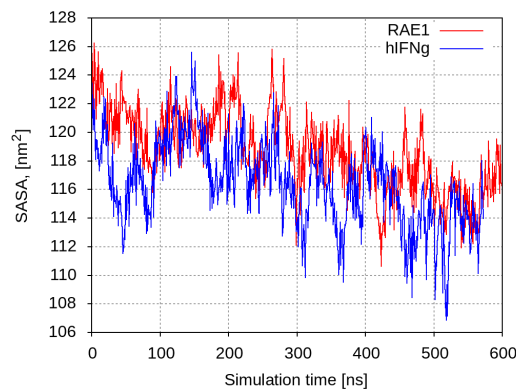

**Figure S4.** Evolution of the SASA of four ORF6 proteins when interaction with RAE1 [1] or hIFN $\gamma$ .

**Table S1.** List of Primers

| Gene | Forward Primer                      | Reverse primer                      |
|------|-------------------------------------|-------------------------------------|
| RAE1 | 5' GGG CTC CTG GGA TTT CTG TC 3'    | 5' GGG CTC CTG GGA TTT CTG TC 3'    |
| EGFP | 5' GAC AAC CAC TAC CTG AGC AC 3'    | 5' GTC CAT GCC GAG AGT GAT C 3'     |
| ACTB | 5' CAC CAT TGG CAA TGA GCG GTT C 3' | 5' AGG TCT TTG CGG ATG TCC ACG T 3' |

References

1. Krachmarova, E.; Petkov, P.; Lilkova, E.; Ilieva, N.; Rangelov, M.; Todorova, N.; Malinova, K.; Hristova, R.; Nacheva, G.; Gospodinov, A.; et al. Insights into the SARS-CoV-2 ORF6 Mechanism of Action. *International Journal of Molecular Sciences* **2023**, *24*. <https://doi.org/10.3390/ijms241411589>.
